# Supplementary material for: A Network-Based Target Overlap Score for Characterizing Drug Combinations: High Correlation with Cancer Clinical Trial Results
Source: PLoS One. 2015 Jun 5;10(6):e0129267. doi: 10.1371/journal.pone.0129267 (PMC4457853; doi:10.1371/journal.pone.0129267)
Supplement: S4 Table — 1Name of the interaction partner taken from drugs; 2Drug labels taken from drugs.com (XLS) [file pone.0129267.s004.xls]

## Sheet: Munka1
		Table S4: Drug interactions tagged as both severe, moderate or minor.
		Component A1	Component B1	Drug-Drug Interaction Category2
		bupropion	acetaminophen	moderate
		bupropion	acetaminophen	major
		bupropion	talacen	major
		bupropion	amobarbital	moderate
		bupropion	amobarbital	major
		bupropion hcl	aspirin	NA
		bupropion	aspirin	moderate
		bupropion	duramax	moderate
		bupropion	aspirin	major
		bupropion	benzocaine	moderate
		bupropion	benzocaine	major
		bupropion	butalbital	moderate
		bupropion	butalbital	major
		bupropion	caffeine	moderate
		bupropion	fioricet	moderate
		bupropion	norgesic forte	moderate
		bupropion	caffeine	major
		bupropion	dhc plus	major
		bupropion	hycomine	major
		bupropion	carbinoxamine	moderate
		bupropion	carbinoxamine	major
		bupropion	chlordiazepoxide	moderate
		bupropion	libritabs	moderate
		bupropion	librium	moderate
		bupropion	chlordiazepoxide	major
		bupropion	control	major
		bupropion	aller-chlor	moderate
		bupropion	chlo-amine	moderate
		bupropion	chlor-trimeton	moderate
		bupropion	chlorpheniramine	moderate
		bupropion	dexchlorpheniramine	moderate
		bupropion	chlorpheniramine	major
		bupropion	dexchlorpheniramine	major
		bupropion	teldrin	major
		bupropion	banophen	moderate
		bupropion	beldin	moderate
		bupropion	belix	moderate
		bupropion	benadryl	moderate
		bupropion	diphen	moderate
		bupropion	diphen cough	moderate
		bupropion	diphenhist	moderate
		bupropion	diphenhydramine	moderate
		bupropion	genahist	moderate
		bupropion	hydramine	moderate
		bupropion	hyrexin	moderate
		bupropion	nytol quickcaps	moderate
		bupropion	siladryl	moderate
		bupropion	vicks formula 44	moderate
		bupropion	diphenhydramine	major
		bupropion	flurbiprofen	major
		bupropion	guaifenesin	moderate
		bupropion	guaifenesin	major
		bupropion	ibuprofen	moderate
		bupropion	ibuprofen	major
		bupropion	lidocaine	moderate
		bupropion	dilocaine	major
		bupropion	l-caine	major
		bupropion	lidocaine	major
		bupropion	xylocaine-mpf	major
		bupropion	equanil	moderate
		bupropion	meprobamate	moderate
		bupropion	micrainin	moderate
		bupropion	miltown	moderate
		bupropion	meprozine	major
		bupropion	methscopolamine	moderate
		bupropion	methscopolamine	major
		bupropion	pheniramine	moderate
		bupropion	pheniramine	major
		bupropion	luminal	moderate
		bupropion	phenobarbital	moderate
		bupropion	solfoton	moderate
		bupropion	phenobarbital	major
		bupropion	pyrilamine	moderate
		bupropion	pyrilamine	major
		bupropion	salicylamide	moderate
		bupropion	salicylamide	major
		bupropion	epinephrine	moderate
		bupropion	bronkaid	major
		bupropion	epinephrine	major
		bupropion	phenylephrine	moderate
		bupropion	phenylephrine	major
		bupropion	brompheniramine	moderate
		bupropion	brompheniramine	major
		bupropion	pseudoephedrine	moderate
		bupropion	pseudoephedrine	major
		bupropion	dexbrompheniramine	moderate
		bupropion	dexbrompheniramine	major
		bupropion	codimal	moderate
		bupropion	ami-tex	major
		bupropion	dexatrim	major
		bupropion	dura-vent	major
		bupropion	guaipax	major
		bupropion	phenyldrine	major
		bupropion	phenylfenesin	major
		bupropion	phenylpropanolamine	major
		bupropion	propagest	major
		bupropion	rhindecon	major
		bupropion hcl	atorvastatin	NA
		bupropion hcl	lipitor	NA
		bupropion	atorvastatin	moderate
		bupropion	scopolamine	moderate
		bupropion	scopolamine	major
		bupropion	hyoscyamine	moderate
		bupropion	hyoscyamine	major
		bupropion	atropine	moderate
		bupropion	atropine	major
		bupropion hcl	crestor	NA
		bupropion hcl	rosuvastatin	NA
		bupropion	azithromycin	major
		bupropion	tenofovir	moderate
		bupropion	naltrexone	moderate
		bupropion	revia	moderate
		bupropion	naltrexone	major
		bupropion	balminil dm	moderate
		bupropion	benylin dm	moderate
		bupropion	cough-x	moderate
		bupropion	creo-terpin	moderate
		bupropion	delsym	moderate
		bupropion	dextromethorphan	moderate
		bupropion	hold dm	moderate
		bupropion	novahistine dm	moderate
		bupropion	dextromethorphan	major
		dicumarol	citric acid	minor
		dicumarol	citric acid	major
		dicumarol	niacin	minor
		dicumarol	simcor	minor
		dicumarol	niacin	moderate
		dicumarol	pyridoxine	minor
		dicumarol	pyridoxine	moderate
		dicumarol	abenol	minor
		dicumarol	acephen	minor
		dicumarol	acetaminophen	minor
		dicumarol	actamin	minor
		dicumarol	alvedon	minor
		dicumarol	aminofen	minor
		dicumarol	atasol	minor
		dicumarol	conacetol	minor
		dicumarol	dafalgan	minor
		dicumarol	doliprane	minor
		dicumarol	dymadon	minor
		dicumarol	febridol	minor
		dicumarol	feverall	minor
		dicumarol	genapap	minor
		dicumarol	genebs	minor
		dicumarol	hedex	minor
		dicumarol	liquiprin	minor
		dicumarol	paldesic	minor
		dicumarol	panadol	minor
		dicumarol	paracetamol	minor
		dicumarol	paraspen	minor
		dicumarol	parmol	minor
		dicumarol	redutemp	minor
		dicumarol	talacen	minor
		dicumarol	tempra	minor
		dicumarol	tylenol	minor
		dicumarol	valorin	minor
		dicumarol	valorin extra	minor
		dicumarol	acetaminophen	moderate
		dicumarol	acetaminophen	major
		dicumarol	momentum	major
		dicumarol	caffeine	minor
		dicumarol	dhc plus	minor
		dicumarol	caffeine	moderate
		dicumarol	diurex	moderate
		dicumarol	caffeine	major
		dicumarol	fioricet	major
		dicumarol	norgesic forte	major
		dicumarol	chlordiazepoxide	minor
		dicumarol	libritabs	minor
		dicumarol	librium	minor
		dicumarol	chlordiazepoxide	moderate
		dicumarol	chlorpheniramine	minor
		dicumarol	chlorpheniramine	moderate
		dicumarol	chlorpheniramine	major
		dicumarol	pennsaid	moderate
		dicumarol	solaraze	moderate
		dicumarol	voltaren ophthalmic	moderate
		dicumarol	cataflam	major
		dicumarol	diclofenac	major
		dicumarol	dyloject	major
		dicumarol	voltaren	major
		dicumarol	voltaren-xr	major
		dicumarol	diphenhydramine	minor
		dicumarol	diphenhydramine	moderate
		dicumarol	diphenhydramine	major
		dicumarol	dipyridamole	moderate
		dicumarol	persantine	moderate
		dicumarol	aggrenox	major
		dicumarol	dipyridamole	major
		dicumarol	ocufen	moderate
		dicumarol	ansaid	major
		dicumarol	flurbiprofen	major
		dicumarol	guaifenesin	minor
		dicumarol	guaifenesin	major
		dicumarol	lidocaine	minor
		dicumarol	lidocaine	moderate
		dicumarol	imipramine	moderate
		dicumarol	im	major
		dicumarol	isoniazid	moderate
		dicumarol	nydrazid	moderate
		dicumarol	isoniazid	major
		dicumarol	rifamate	major
		dicumarol	ketoprofen	moderate
		dicumarol	actron	major
		dicumarol	ketoprofen	major
		dicumarol	orudis	major
		dicumarol	orudis kt	major
		dicumarol	oruvail	major
		dicumarol	acular	moderate
		dicumarol	acular ls	moderate
		dicumarol	ketorolac	moderate
		dicumarol	ketorolac	major
		dicumarol	toradol	major
		dicumarol	lansoprazole	moderate
		dicumarol	prevacid	moderate
		dicumarol	prevacid iv	moderate
		dicumarol	prevacid solutab	moderate
		dicumarol	lansoprazole	major
		dicumarol	q-gesic	minor
		dicumarol	meprobamate	moderate
		dicumarol	meprobamate	major
		dicumarol	micrainin	major
		dicumarol	tricom	minor
		dicumarol	flagyl	major
		dicumarol	flagyl er	major
		dicumarol	metronidazole	major
		dicumarol	protostat	major
		dicumarol	omeprazole	moderate
		dicumarol	prilosec	moderate
		dicumarol	zegerid	moderate
		dicumarol	omeprazole	major
		dicumarol	pheniramine	minor
		dicumarol	pheniramine	moderate
		dicumarol	salicylamide	moderate
		dicumarol	salicylamide	major
		dicumarol	primsol	moderate
		dicumarol	proloprim	moderate
		dicumarol	trimethoprim	moderate
		dicumarol	trimpex	moderate
		dicumarol	co-trimoxazole	major
		dicumarol	cotrim	major
		dicumarol	septra	major
		dicumarol	sulfatrim	major
		dicumarol	trimethoprim	major
		dicumarol	alora	moderate
		dicumarol	climara	moderate
		dicumarol	divigel	moderate
		dicumarol	elestrin	moderate
		dicumarol	estrace	moderate
		dicumarol	estradiol	moderate
		dicumarol	estring	moderate
		dicumarol	estrofem	moderate
		dicumarol	estrogel	moderate
		dicumarol	evamist	moderate
		dicumarol	femring	moderate
		dicumarol	femtrace	moderate
		dicumarol	gynodiol	moderate
		dicumarol	menostar	moderate
		dicumarol	vivelle-dot	moderate
		dicumarol	estradiol	major
		dicumarol	phenylephrine	minor
		dicumarol	phenylephrine	moderate
		dicumarol	phenylephrine	major
		dicumarol	brompheniramine	minor
		dicumarol	brompheniramine	major
		dicumarol	pseudoephedrine	minor
		dicumarol	pseudoephedrine	major
		dicumarol	darvon	moderate
		dicumarol	propoxyphene	moderate
		dicumarol	propoxyphene	major
		dicumarol	calcium carbonate	minor
		dicumarol	calcium carbonate	major
		dicumarol	sodium bicarbonate	moderate
		dicumarol	sodium bicarbonate	major
		dicumarol	codimal	minor
		dicumarol	phenylpropanolamine	minor
		dicumarol	phenylpropanolamine	moderate
		dicumarol	phenylpropanolamine	major
		dicumarol	amoxicillin	moderate
		dicumarol	amoxil	moderate
		dicumarol	biomox	moderate
		dicumarol	dispermox	moderate
		dicumarol	trimox	moderate
		dicumarol	wymox	moderate
		dicumarol	amoxicillin	major
		dicumarol	pravachol	minor
		dicumarol	pravastatin	minor
		dicumarol	pravastatin	major
		dicumarol	xibrom	moderate
		dicumarol	bromfenac	major
		dicumarol	duract	major
		dicumarol	aluminum hydroxide	minor
		dicumarol	aluminum hydroxide	major
		dicumarol	hyoscyamine	moderate
		dicumarol	hyoscyamine	major
		dicumarol	conjugated estrogens	moderate
		dicumarol	premarin	moderate
		dicumarol	premarin vaginal	moderate
		dicumarol	prempro	moderate
		dicumarol	conjugated estrogens	major
		dicumarol	pentazocine	minor
		dicumarol	pentazocine	major
		dicumarol	azithromycin	moderate
		dicumarol	zithromax	moderate
		dicumarol	zmax	moderate
		dicumarol	azithromycin	major
		dicumarol	achromycin v	moderate
		dicumarol	actisite	moderate
		dicumarol	panmycin	moderate
		dicumarol	sumycin	moderate
		dicumarol	tetracycline	moderate
		dicumarol	tetracycline	major
		dicumarol	oxytetracycline	moderate
		dicumarol	terramycin	moderate
		dicumarol	oxytetracycline	major
		dicumarol	codeine	minor
		dicumarol	codeine	major
		dicumarol	dihydrocodeine	minor
		dicumarol	dihydrocodeine	major
		dicumarol	hydrocodone	minor
		dicumarol	hydrocodone	major
		dicumarol	oxycodone	minor
		dicumarol	endodan	major
		dicumarol	oxycodone	major
		dicumarol	dextromethorphan	minor
		dicumarol	dextromethorphan	moderate
		dicumarol	dextromethorphan	major
		dicumarol	famotidine	minor
		dicumarol	famotidine	major
		dicumarol	esomeprazole	moderate
		dicumarol	nexium	moderate
		dicumarol	esomeprazole	major
		dicumarol	bismatrol	moderate
		dicumarol	bismuth subsalicylate	moderate
		dicumarol	pepto-bismol	moderate
		dicumarol	bismuth subsalicylate	major
		dopamine hcl	acetaminophen	NA
		dopamine hcl	paracetamol	NA
		dopamine	acetaminophen	moderate
		dopamine	control	moderate
		dopamine	chlordiazepoxide	major
		dopamine hcl	demerol	NA
		dopamine hcl	meperidine	NA
		dopamine	meperidine	moderate
		dopamine	perphenazine	moderate
		dopamine	trilafon	moderate
		dopamine	perphenazine	major
		dopamine	hyoscyamine	moderate
		dopamine	hyoscyamine	major
		ethanol	magnesium salicylate	moderate
		ethanol	magnesium salicylate	major
		ethanol	niacin	moderate
		ethanol	niaspan	moderate
		ethanol	nicotinic acid	moderate
		ethanol	simcor	moderate
		ethanol	pyridoxine	moderate
		ethanol	pyridoxine	major
		ethanol	momentum	moderate
		ethanol	abenol	major
		ethanol	acephen	major
		ethanol	acetaminophen	major
		ethanol	actamin	major
		ethanol	alvedon	major
		ethanol	aminofen	major
		ethanol	atasol	major
		ethanol	conacetol	major
		ethanol	dafalgan	major
		ethanol	doliprane	major
		ethanol	dymadon	major
		ethanol	febridol	major
		ethanol	feverall	major
		ethanol	genapap	major
		ethanol	genebs	major
		ethanol	hedex	major
		ethanol	liquiprin	major
		ethanol	paldesic	major
		ethanol	panadol	major
		ethanol	paracetamol	major
		ethanol	paraspen	major
		ethanol	parmol	major
		ethanol	redutemp	major
		ethanol	talacen	major
		ethanol	tempra	major
		ethanol	tylenol	major
		ethanol	valorin	major
		ethanol	valorin extra	major
		ethanol	theophylline	moderate
		ethanol	theophylline	major
		ethanol 200 proof	amlodipine	NA
		ethanol absolute	amlodipine	NA
		ethanol absolute bp	amlodipine	NA
		ethanol anhydrous	amlodipine	NA
		ethanol extra pure	amlodipine	NA
		ethanol, silent spirit	amlodipine	NA
		ethanol 200 proof	norvasc	NA
		ethanol absolute	norvasc	NA
		ethanol absolute bp	norvasc	NA
		ethanol anhydrous	norvasc	NA
		ethanol extra pure	norvasc	NA
		ethanol, silent spirit	norvasc	NA
		ethanol	amlodipine	moderate
		ethanol	lotrel	moderate
		ethanol	acetylsalicylic acid	moderate
		ethanol	aspergum	moderate
		ethanol	aspirin	moderate
		ethanol 200 proof	aspirin	moderate
		ethanol absolute	aspirin	moderate
		ethanol absolute bp	aspirin	moderate
		ethanol anhydrous	aspirin	moderate
		ethanol extra pure	aspirin	moderate
		ethanol, silent spirit	aspirin	moderate
		ethanol	bufferin	moderate
		ethanol	duramax	moderate
		ethanol	easprin	moderate
		ethanol	ecotrin	moderate
		ethanol	empirin	moderate
		ethanol	aspirin	major
		ethanol	supac	major
		ethanol	bupivacaine	moderate
		ethanol	bupivacaine	major
		ethanol	caffeine	moderate
		ethanol	diurex	moderate
		ethanol	norgesic forte	moderate
		ethanol	caffeine	major
		ethanol	dhc plus	major
		ethanol	fioricet	major
		ethanol	hycomine	major
		ethanol	carbinoxamine	moderate
		ethanol	carbinoxamine	major
		ethanol	aller-chlor	moderate
		ethanol	chlo-amine	moderate
		ethanol	chlor-trimeton	moderate
		ethanol	chlorpheniramine	moderate
		ethanol	dexchlorpheniramine	moderate
		ethanol	polaramine	moderate
		ethanol	teldrin	moderate
		ethanol	chlorpheniramine	major
		ethanol	dexchlorpheniramine	major
		ethanol	chlophedianol	moderate
		ethanol	chlophedianol	major
		ethanol	banophen	moderate
		ethanol	beldin	moderate
		ethanol	belix	moderate
		ethanol	benadryl	moderate
		ethanol	diphen	moderate
		ethanol	diphen cough	moderate
		ethanol	diphenhist	moderate
		ethanol	diphenhydramine	moderate
		ethanol	genahist	moderate
		ethanol	hydramine	moderate
		ethanol	hyrexin	moderate
		ethanol	nytol quickcaps	moderate
		ethanol	siladryl	moderate
		ethanol	vicks formula 44	moderate
		ethanol	diphenhydramine	major
		ethanol	doxylamine	moderate
		ethanol	doxylamine	major
		ethanol	actiq	moderate
		ethanol	duragesic	moderate
		ethanol	duragesic-100	moderate
		ethanol	fentanyl	moderate
		ethanol	fentanyl	major
		ethanol	guaifenesin	moderate
		ethanol	guaifenesin	major
		ethanol	actiprofen	moderate
		ethanol	advil	moderate
		ethanol	advil liqui-gels	moderate
		ethanol	cap-profen	moderate
		ethanol	haltran	moderate
		ethanol	ibu	moderate
		ethanol	ibu-tab	moderate
		ethanol	ibuprofen	moderate
		ethanol	motrin	moderate
		ethanol	neoprofen	moderate
		ethanol	nuprin	moderate
		ethanol	rufen	moderate
		ethanol	ibuprofen	major
		ethanol	equanil	moderate
		ethanol	meprobamate	moderate
		ethanol	meprozine	moderate
		ethanol	micrainin	moderate
		ethanol	miltown	moderate
		ethanol	q-gesic	major
		ethanol	flagyl	moderate
		ethanol	flagyl er	moderate
		ethanol	metrocream	moderate
		ethanol	metrogel	moderate
		ethanol	metrogel-vaginal	moderate
		ethanol	metrolotion	moderate
		ethanol	metronidazole	moderate
		ethanol	noritate	moderate
		ethanol	protostat	moderate
		ethanol	tricom	major
		ethanol	pheniramine	moderate
		ethanol	pheniramine	major
		ethanol	potassium iodide	moderate
		ethanol	potassium iodide	major
		ethanol	pyrilamine	moderate
		ethanol	pyrilamine	major
		ethanol	salicylamide	moderate
		ethanol	salicylamide	major
		ethanol	phenylephrine	moderate
		ethanol	phenylephrine	major
		ethanol	aygestin	minor
		ethanol	brevicon	minor
		ethanol	camila	minor
		ethanol	demulen	minor
		ethanol	errin	minor
		ethanol	jenest	minor
		ethanol	loestrin 24 fe	minor
		ethanol	nor-qd	minor
		ethanol	norethindrone	minor
		ethanol	tri-norinyl	minor
		ethanol	ent	moderate
		ethanol	bromfed	moderate
		ethanol	bromfenex	moderate
		ethanol	brompheniramine	moderate
		ethanol	veltane	moderate
		ethanol	brompheniramine	major
		ethanol	pseudoephedrine	moderate
		ethanol	pseudoephedrine	major
		ethanol	ephedrine	moderate
		ethanol	ephedrine	major
		ethanol	dexbrompheniramine	moderate
		ethanol	dexbrompheniramine	major
		ethanol	ami-tex	moderate
		ethanol	conex	moderate
		ethanol	dexatrim	moderate
		ethanol	dura-vent	moderate
		ethanol	guaipax	moderate
		ethanol	phenyldrine	moderate
		ethanol	phenylfenesin	moderate
		ethanol	phenylpropanolamine	moderate
		ethanol	propagest	moderate
		ethanol	rhindecon	moderate
		ethanol	codimal	major
		ethanol	phenylpropanolamine	major
		ethanol	clemastine	moderate
		ethanol	tavist	moderate
		ethanol	tavist-1	moderate
		ethanol	clemastine	major
		ethanol	tramadol	moderate
		ethanol	tramal	moderate
		ethanol	ultram	moderate
		ethanol	ultram er	moderate
		ethanol	tramadol	major
		ethanol	aluminum hydroxide	moderate
		ethanol	aluminum hydroxide	major
		ethanol	scopolamine	moderate
		ethanol	transderm-scop	moderate
		ethanol	scopolamine	major
		ethanol	anaspaz	moderate
		ethanol	cystospaz	moderate
		ethanol	donnamar	moderate
		ethanol	gastrosed	moderate
		ethanol	hyoscyamine	moderate
		ethanol	levbid	moderate
		ethanol	levsin	moderate
		ethanol	levsinex	moderate
		ethanol	nulev	moderate
		ethanol	hyoscyamine	major
		ethanol	atnaa	moderate
		ethanol	atropen	moderate
		ethanol	atropine	moderate
		ethanol	atropine	major
		ethanol	pentazocine	moderate
		ethanol	pentazocine	major
		ethanol	triprolidine	moderate
		ethanol	triprolidine	major
		ethanol	codeine	moderate
		ethanol	codeine	major
		ethanol	dihydrocodeine	moderate
		ethanol	dihydrocodeine	major
		ethanol	naloxone	moderate
		ethanol	naloxone	major
		ethanol	endodan	moderate
		ethanol	oxycodone	moderate
		ethanol	oxycontin	moderate
		ethanol	oxyfast	moderate
		ethanol	oxyir	moderate
		ethanol	percolone	moderate
		ethanol	roxicodone	moderate
		ethanol	oxycodone	major
		ethanol	depodur	moderate
		ethanol	astramorph pf	major
		ethanol	avinza	major
		ethanol	duramorph pf	major
		ethanol	kadian	major
		ethanol	m-eslon	major
		ethanol	morphine	major
		ethanol	morphitec	major
		ethanol	ms contin	major
		ethanol	msir	major
		ethanol	oramorph sr	major
		ethanol	rescudose	major
		ethanol	roxanol	major
		ethanol	roxanol 100	major
		ethanol	naltrexone	moderate
		ethanol	revia	moderate
		ethanol	naltrexone	major
		ethanol	balminil dm	moderate
		ethanol	benylin dm	moderate
		ethanol	cough-x	moderate
		ethanol	creo-terpin	moderate
		ethanol	delsym	moderate
		ethanol	dextromethorphan	moderate
		ethanol	hold dm	moderate
		ethanol	novahistine dm	moderate
		ethanol	dextromethorphan	major
		enoxaparin	acetaminophen	moderate
		enoxaparin	acetaminophen	major
		enoxaparin	momentum	major
		enoxaparin	caffeine	moderate
		enoxaparin	diurex	moderate
		enoxaparin	caffeine	major
		enoxaparin	norgesic forte	major
		enoxaparin	chlorpheniramine	moderate
		enoxaparin	chlorpheniramine	major
		enoxaparin	pennsaid	moderate
		enoxaparin	solaraze	moderate
		enoxaparin	voltaren ophthalmic	moderate
		enoxaparin	cataflam	major
		enoxaparin	diclofenac	major
		enoxaparin	dyloject	major
		enoxaparin	voltaren	major
		enoxaparin	voltaren-xr	major
		enoxaparin	diphenhydramine	moderate
		enoxaparin	diphenhydramine	major
		enoxaparin	ocufen	moderate
		enoxaparin	ansaid	major
		enoxaparin	flurbiprofen	major
		enoxaparin	ketoprofen	moderate
		enoxaparin	actron	major
		enoxaparin	ketoprofen	major
		enoxaparin	orudis	major
		enoxaparin	orudis kt	major
		enoxaparin	oruvail	major
		enoxaparin	acular	moderate
		enoxaparin	acular ls	moderate
		enoxaparin	ketorolac	moderate
		enoxaparin	ketorolac	major
		enoxaparin	toradol	major
		enoxaparin	salicylamide	moderate
		enoxaparin	salicylamide	major
		enoxaparin	phenylephrine	moderate
		enoxaparin	phenylephrine	major
		enoxaparin	phenylpropanolamine	moderate
		enoxaparin	phenylpropanolamine	major
		enoxaparin	xibrom	moderate
		enoxaparin	bromfenac	major
		enoxaparin	duract	major
		enoxaparin	endodan	major
		enoxaparin	oxycodone	major
		melatonin	aspirin	minor
		melatonin	supac	minor
		melatonin	cipro	minor
		melatonin	cipro i.v.	minor
		melatonin	cipro xr	minor
		melatonin	ciprofloxacin	minor
		melatonin	proquin xr	minor
		melatonin	norfloxacin	minor
		melatonin	noroxin	minor
		melatonin	floxin	minor
		melatonin	ofloxacin	minor
		melatonin	gatifloxacin	minor
		melatonin	tequin	minor
		melatonin	mibefradil	minor
		melatonin	posicor	minor
		melatonin	avelox	minor
		melatonin	avelox i.v.	minor
		melatonin	moxifloxacin	minor
		melatonin	atazanavir	minor
		melatonin	reyataz	minor
		melatonin	rifadin	minor
		melatonin	rifampin	minor
		melatonin	rimactane	minor
		nicotine acid	alcohol	NA
		niacin	alcohol	moderate
		niacin	ethanol	moderate
		niacin	ethyl alcohol	moderate
		nicotine acid	acetaminophen	NA
		nicotine acid	tylenol	NA
		niacin	acetaminophen	minor
		niacin	momentum	minor
		niacin	acetylsalicylic acid	minor
		niacin	aspergum	minor
		niacin	aspirin	minor
		niacin	bufferin	minor
		niacin	easprin	minor
		niacin	ecotrin	minor
		niacin	empirin	minor
		niacin	supac	minor
		niacin	aspirin	moderate
		niacin	carbamazepine	minor
		niacin	carbatrol	minor
		niacin	epitol	minor
		niacin	equetro	minor
		niacin	tegretol	minor
		niacin	metronidazole	minor
		niacin	ezetimibe	major
		niacin	januvia	moderate
		niacin	sitagliptin	moderate
		niacin	sitagliptin	major
		pyrazinamide bp 2000	acetaminophen	NA
		pyrazinamide bp 2000	paracetamol	NA
		pyrazinamide bp 2000	isoptin	NA
		pyrazinamide bp 2000	isoptin sr	NA
		pyrazinamide bp 2000	verapamil	NA
		pyrazinamide bp 2000	allegra	NA
		pyrazinamide bp 2000	fexofenadine	NA
		pyrazinamide bp 2000	levodopa	NA
		pyrazinamide bp 2000	diltiazem	NA
		pyrazinamide bp 2000	januvia	NA
		pyrazinamide bp 2000	sitagliptin	NA
		pyrazinamide	cyclosporine	moderate
		pyridoxine	amobarbital	minor
		pyridoxine	aspirin	minor
		pyridoxine	butabarbital	minor
		pyridoxine	butisol sodium	minor
		pyridoxine	butalbital	minor
		pyridoxine	guaifenesin	moderate
		pyridoxine	nembutal	minor
		pyridoxine	nembutal sodium	minor
		pyridoxine	pentobarbital	minor
		pyridoxine	mysoline	minor
		pyridoxine	primidone	minor
		pyridoxine	secobarbital	minor
		pyridoxine	seconal	minor
		pyridoxine	ergotamine	minor
		pyridoxine	ergotamine	moderate
		pyridoxine	mebaral	minor
		pyridoxine	mephobarbital	minor
		pyridoxine	brevital sodium	minor
		pyridoxine	methohexital	minor
		pyridoxine	ephedrine	minor
		pyridoxine	ephedrine	moderate
		pyridoxine	aminophylline	minor
		pyridoxine	aminophylline	moderate
		pyridoxine	scopolamine	moderate
		pyridoxine	hyoscyamine	minor
		pyridoxine	hyoscyamine	moderate
		pyridoxine	atropine	moderate
		pyridoxine	pentothal	minor
		pyridoxine	thiopental	minor
		pyridoxine	codeine	minor
		phenytoin	magnesium salicylate	minor
		phenytoin	magnesium salicylate	moderate
		phenytoin	abenol	moderate
		phenytoin	acephen	moderate
		phenytoin	acetaminophen	moderate
		phenytoin awd	acetaminophen	moderate
		phenytoin sodium	acetaminophen	moderate
		phenytoin	actamin	moderate
		phenytoin	alvedon	moderate
		phenytoin	aminofen	moderate
		phenytoin	atasol	moderate
		phenytoin	conacetol	moderate
		phenytoin	dafalgan	moderate
		phenytoin	doliprane	moderate
		phenytoin	dymadon	moderate
		phenytoin	febridol	moderate
		phenytoin	feverall	moderate
		phenytoin	genapap	moderate
		phenytoin	genebs	moderate
		phenytoin	hedex	moderate
		phenytoin	liquiprin	moderate
		phenytoin	momentum	moderate
		phenytoin	paldesic	moderate
		phenytoin	panadol	moderate
		phenytoin	paracetamol	moderate
		phenytoin awd	paracetamol	moderate
		phenytoin sodium	paracetamol	moderate
		phenytoin	paraspen	moderate
		phenytoin	parmol	moderate
		phenytoin	redutemp	moderate
		phenytoin	talacen	moderate
		phenytoin	tempra	moderate
		phenytoin	tylenol	moderate
		phenytoin awd	tylenol	moderate
		phenytoin sodium	tylenol	moderate
		phenytoin	valorin	moderate
		phenytoin	valorin extra	moderate
		phenytoin	acetaminophen	major
		phenytoin	acetylsalicylic acid	minor
		phenytoin	aspergum	minor
		phenytoin	aspirin	minor
		phenytoin awd	aspirin	minor
		phenytoin sodium	aspirin	minor
		phenytoin	bufferin	minor
		phenytoin	easprin	minor
		phenytoin	ecotrin	minor
		phenytoin	empirin	minor
		phenytoin	aspirin	moderate
		phenytoin	supac	moderate
		phenytoin	aspirin	major
		phenytoin	bupivacaine	minor
		phenytoin	marcaine	minor
		phenytoin	marcaine hcl	minor
		phenytoin	sensorcaine	minor
		phenytoin	sensorcaine-mpf	minor
		phenytoin	bupivacaine	moderate
		phenytoin	caffeine	minor
		phenytoin	diurex	minor
		phenytoin	caffeine	moderate
		phenytoin	dhc plus	moderate
		phenytoin	fioricet	moderate
		phenytoin	hycomine	moderate
		phenytoin	norgesic forte	moderate
		phenytoin	wigraine	moderate
		phenytoin	caffeine	major
		phenytoin	actiprofen	minor
		phenytoin	advil	minor
		phenytoin	advil liqui-gels	minor
		phenytoin	cap-profen	minor
		phenytoin	haltran	minor
		phenytoin	ibu	minor
		phenytoin	ibu-tab	minor
		phenytoin	ibuprofen	minor
		phenytoin	motrin	minor
		phenytoin	neoprofen	minor
		phenytoin	nuprin	minor
		phenytoin	rufen	minor
		phenytoin	ibuprofen	moderate
		phenytoin	dilocaine	minor
		phenytoin	l-caine	minor
		phenytoin	lidocaine	minor
		phenytoin	xylocaine-mpf	minor
		phenytoin	lidocaine	moderate
		phenytoin	lidocaine	major
		phenytoin	loxapine	minor
		phenytoin	loxitane c	minor
		phenytoin	loxitane im	minor
		phenytoin	nimodipine	major
		phenytoin	nimotop	major
		phenytoin	phenazopyridine	minor
		phenytoin	phenazopyridine	moderate
		phenytoin	potassium chloride	minor
		phenytoin	potassium chloride	moderate
		phenytoin	salicylamide	minor
		phenytoin	salicylamide	moderate
		phenytoin	gantanol	minor
		phenytoin	sulfamethoxazole	minor
		phenytoin	sulfamethoxazole	moderate
		phenytoin	vigabatrin	minor
		phenytoin	alora	moderate
		phenytoin	climara	moderate
		phenytoin	divigel	moderate
		phenytoin	elestrin	moderate
		phenytoin	estrace	moderate
		phenytoin	estradiol	moderate
		phenytoin	estring	moderate
		phenytoin	estrofem	moderate
		phenytoin	estrogel	moderate
		phenytoin	evamist	moderate
		phenytoin	femring	moderate
		phenytoin	femtrace	moderate
		phenytoin	gynodiol	moderate
		phenytoin	menostar	moderate
		phenytoin	vivelle-dot	moderate
		phenytoin	estradiol	major
		phenytoin	epinephrine	minor
		phenytoin	epinephrine	moderate
		phenytoin	citanest forte	major
		phenytoin	epinephrine	major
		phenytoin	folic acid	moderate
		phenytoin	folvite	moderate
		phenytoin	folic acid	major
		phenytoin	phenylephrine	minor
		phenytoin	phenylephrine	moderate
		phenytoin	ent	moderate
		phenytoin	aygestin	major
		phenytoin	brevicon	major
		phenytoin	camila	major
		phenytoin	demulen	major
		phenytoin	errin	major
		phenytoin	jenest	major
		phenytoin	loestrin 24 fe	major
		phenytoin	nor-qd	major
		phenytoin	norethindrone	major
		phenytoin	tri-norinyl	major
		phenytoin	pseudoephedrine	minor
		phenytoin	pseudoephedrine	moderate
		phenytoin awd	atorvastatin	NA
		phenytoin sodium	atorvastatin	NA
		phenytoin awd	lipitor	NA
		phenytoin sodium	lipitor	NA
		phenytoin	atorvastatin	moderate
		phenytoin	lamivudine	minor
		phenytoin	lamivudine	major
		phenytoin	geodon	minor
		phenytoin	ziprasidone	minor
		phenytoin	emtricitabine	moderate
		phenytoin	emtricitabine	major
		phenytoin	vfend	major
		phenytoin	voriconazole	major
		phenytoin	bortezomib	moderate
		phenytoin	velcade	moderate
		phenytoin	atazanavir	moderate
		phenytoin	reyataz	moderate
		phenytoin	atazanavir	major
		phenytoin	norvir	moderate
		phenytoin	ritonavir	moderate
		phenytoin	ritonavir	major
		phenytoin	abacavir	minor
		phenytoin	abacavir	major
		phenytoin	tenofovir	moderate
		phenytoin	tenofovir	major
		phenytoin	oxytetracycline	minor
		phenytoin	oxytetracycline	moderate
		phenytoin	naloxone	moderate
		phenytoin	naloxone	major
		phenytoin awd	cyanocobalamin	NA
		phenytoin sodium	cyanocobalamin	NA
		phenytoin awd	vitamin b12	NA
		phenytoin sodium	vitamin b12	NA
		phenytoin	cyanocobalamin	moderate
		phenytoin	bismatrol	minor
		phenytoin	bismuth subsalicylate	minor
		phenytoin	pepto-bismol	minor
		phenytoin	bismuth subsalicylate	moderate
		tacrine	acetaminophen	minor
		tacrine	talacen	minor
		tacrine	acetaminophen	moderate
		tacrine	momentum	moderate
		tacrine	acetaminophen	major
		tacrine	aspirin	minor
		tacrine	aspirin	moderate
		tacrine	caffeine	minor
		tacrine	dhc plus	minor
		tacrine	hycomine	minor
		tacrine	caffeine	moderate
		tacrine	norgesic forte	moderate
		tacrine	guaifenesin	minor
		tacrine	guaifenesin	moderate
		tacrine	actiprofen	minor
		tacrine	advil	minor
		tacrine	advil liqui-gels	minor
		tacrine	cap-profen	minor
		tacrine	haltran	minor
		tacrine	ibu	minor
		tacrine	ibu-tab	minor
		tacrine	ibuprofen	minor
		tacrine	motrin	minor
		tacrine	neoprofen	minor
		tacrine	nuprin	minor
		tacrine	rufen	minor
		tacrine	ibuprofen	moderate
		tacrine	demerol	minor
		tacrine	meperidine	minor
		tacrine	meperidine	moderate
		tacrine	phenylephrine	minor
		tacrine	phenylephrine	moderate
		tacrine	pseudoephedrine	minor
		tacrine	pseudoephedrine	moderate
		tacrine	phenylpropanolamine	minor
		tacrine	codimal	moderate
		tacrine	conex	moderate
		tacrine	dura-vent	moderate
		tacrine	phenylpropanolamine	moderate
		tacrine	codeine	minor
		tacrine	codeine	moderate
		tacrine	dihydrocodeine	minor
		tacrine	dihydrocodeine	moderate
		tacrine	hydrocodone	minor
		tacrine	hydrocodone	moderate
		tacrine	astramorph pf	minor
		tacrine	avinza	minor
		tacrine	duramorph pf	minor
		tacrine	kadian	minor
		tacrine	m-eslon	minor
		tacrine	morphine	minor
		tacrine	morphitec	minor
		tacrine	ms contin	minor
		tacrine	msir	minor
		tacrine	oramorph sr	minor
		tacrine	rescudose	minor
		tacrine	roxanol	minor
		tacrine	roxanol 100	minor
		tacrine	morphine	moderate
		tacrine	naltrexone	moderate
		tacrine	revia	moderate
		tacrine	naltrexone	major
		acebutolol	magnesium salicylate	minor
		acebutolol	magnesium salicylate	moderate
		acebutolol	acetaminophen	minor
		acebutolol	momentum	minor
		acebutolol	acetaminophen	moderate
		acebutolol	talacen	moderate
		acebutolol	amobarbital	moderate
		acebutolol	amobarbital	major
		acebutolol	acetylsalicylic acid	minor
		acebutolol	aspergum	minor
		acebutolol	aspirin	minor
		acebutolol	bufferin	minor
		acebutolol	easprin	minor
		acebutolol	ecotrin	minor
		acebutolol	empirin	minor
		acebutolol	supac	minor
		acebutolol	aspirin	moderate
		acebutolol	duramax	moderate
		acebutolol	caffeine	minor
		acebutolol	diurex	minor
		acebutolol	caffeine	moderate
		acebutolol	dhc plus	moderate
		acebutolol	fioricet	moderate
		acebutolol	norgesic forte	moderate
		acebutolol	wigraine	moderate
		acebutolol	chlorpheniramine	minor
		acebutolol	chlorpheniramine	moderate
		acebutolol	dexchlorpheniramine	moderate
		acebutolol hcl	fluoxetine	NA
		acebutolol hydrochloride	fluoxetine	NA
		acebutolol hcl	prozac	NA
		acebutolol hydrochloride	prozac	NA
		acebutolol	fluoxetine	moderate
		acebutolol	guaifenesin	moderate
		acebutolol	guaifenesin	major
		acebutolol	atarax	moderate
		acebutolol	hydroxyzine	moderate
		acebutolol	vistaril	moderate
		acebutolol	vistazine	moderate
		acebutolol	hydroxyzine	major
		acebutolol	luminal	moderate
		acebutolol	phenobarbital	moderate
		acebutolol	solfoton	moderate
		acebutolol	phenobarbital	major
		acebutolol	potassium iodide	moderate
		acebutolol	potassium iodide	major
		acebutolol	salicylamide	minor
		acebutolol	salicylamide	moderate
		acebutolol	folic acid	minor
		acebutolol	folic acid	moderate
		acebutolol	brompheniramine	minor
		acebutolol	bromfed	moderate
		acebutolol	brompheniramine	moderate
		acebutolol	pseudoephedrine	minor
		acebutolol	pseudoephedrine	moderate
		acebutolol	ephedrine	moderate
		acebutolol	ephedrine	major
		acebutolol	sodium bicarbonate	minor
		acebutolol	sodium bicarbonate	moderate
		acebutolol	phenylpropanolamine	minor
		acebutolol	ami-tex	moderate
		acebutolol	despec	moderate
		acebutolol	phenylfenesin	moderate
		acebutolol	phenylpropanolamine	moderate
		acebutolol hcl	atorvastatin	NA
		acebutolol hydrochloride	atorvastatin	NA
		acebutolol hcl	lipitor	NA
		acebutolol hydrochloride	lipitor	NA
		acebutolol	atorvastatin	moderate
		acebutolol	alternagel	minor
		acebutolol	alu-cap	minor
		acebutolol	aluminum hydroxide	minor
		acebutolol	amphojel	minor
		acebutolol	aluminum hydroxide	moderate
		acebutolol hcl	cholecalciferol	NA
		acebutolol hydrochloride	cholecalciferol	NA
		acebutolol hcl	vitamin d3	NA
		acebutolol hydrochloride	vitamin d3	NA
		acebutolol	cholecalciferol	moderate
		acebutolol	hydrocodone	minor
		acebutolol	hydrocodone	moderate
		acebutolol	dextromethorphan	minor
		acebutolol	dextromethorphan	moderate
		acebutolol	enalapril	moderate
		acebutolol	enalapril	major
		acebutolol hcl	esomeprazole	NA
		acebutolol hydrochloride	esomeprazole	NA
		acebutolol hcl	nexium	NA
		acebutolol hydrochloride	nexium	NA
		acebutolol	esomeprazole	moderate
		acetaminophen	bupropion	moderate
		acetaminophen	dicumarol	minor
		acetaminophen	alcohol	major
		acetaminophen	ethanol	major
		acetaminophen	ethyl alcohol	major
		acetaminophen	pyrazinamide	moderate
		acetaminophen	dilantin	moderate
		acetaminophen	mesantoin	moderate
		acetaminophen	phenytoin	moderate
		acetaminophen	phenytoin sodium	moderate
		acetaminophen	theophylline	moderate
		acetaminophen	amobarbital	moderate
		acetaminophen	anisindione	minor
		acetaminophen	miradon	minor
		acetaminophen	aspirin	moderate
		acetaminophen	akineton	minor
		acetaminophen	biperiden	minor
		acetaminophen	butabarbital	moderate
		acetaminophen	butisol sodium	moderate
		acetaminophen	butalbital	moderate
		acetaminophen	caffeine	minor
		acetaminophen	caffeine	moderate
		acetaminophen	fioricet	moderate
		acetaminophen	carbamazepine	moderate
		acetaminophen	carbatrol	moderate
		acetaminophen	epitol	moderate
		acetaminophen	equetro	moderate
		acetaminophen	tegretol	moderate
		acetaminophen	carbinoxamine	minor
		acetaminophen	chlordiazepoxide	minor
		acetaminophen	chlorpheniramine	minor
		acetaminophen	dexchlorpheniramine	minor
		acetaminophen	cimetidine	minor
		acetaminophen	tagamet	minor
		acetaminophen	tagamet hb	minor
		acetaminophen	clidinium	minor
		acetaminophen	quarzan	minor
		acetaminophen	bentyl	minor
		acetaminophen	dicyclomine	minor
		acetaminophen	diflunisal	minor
		acetaminophen	dolobid	minor
		acetaminophen	edrophonium	minor
		acetaminophen	ethotoin	moderate
		acetaminophen	peganone	moderate
		acetaminophen	corlopam	minor
		acetaminophen	fenoldopam	minor
		acetaminophen	flavoxate	minor
		acetaminophen	urispas	minor
		acetaminophen	glycopyrrolate	minor
		acetaminophen	robinul	minor
		acetaminophen	guaifenesin	minor
		acetaminophen	guaifenesin	moderate
		acetaminophen	hydrochlorothiazide	minor
		acetaminophen	lidocaine	major
		acetaminophen	cantil	minor
		acetaminophen	mepenzolate	minor
		acetaminophen	mephenytoin	moderate
		acetaminophen	methscopolamine	minor
		acetaminophen	pamine	minor
		acetaminophen	oxazepam	minor
		acetaminophen	serax	minor
		acetaminophen	ditropan	minor
		acetaminophen	ditropan xl	minor
		acetaminophen	oxybutynin	minor
		acetaminophen	oxytrol	minor
		acetaminophen	nembutal	moderate
		acetaminophen	nembutal sodium	moderate
		acetaminophen	pentobarbital	moderate
		acetaminophen	luminal	moderate
		acetaminophen	phenobarbital	moderate
		acetaminophen	solfoton	moderate
		acetaminophen	mysoline	moderate
		acetaminophen	primidone	moderate
		acetaminophen	benemid	minor
		acetaminophen	probenecid	minor
		acetaminophen	kemadrin	minor
		acetaminophen	procyclidine	minor
		acetaminophen	pro-banthine	minor
		acetaminophen	propantheline	minor
		acetaminophen	inderal	minor
		acetaminophen	inderal la	minor
		acetaminophen	inderide	minor
		acetaminophen	innopran xl	minor
		acetaminophen	propranolol	minor
		acetaminophen	secobarbital	moderate
		acetaminophen	seconal	moderate
		acetaminophen	gleevec	moderate
		acetaminophen	imatinib	moderate
		acetaminophen	artane	minor
		acetaminophen	trihexane	minor
		acetaminophen	trihexy	minor
		acetaminophen	trihexyphenidyl	minor
		acetaminophen	citanest forte	major
		acetaminophen	epinephrine	major
		acetaminophen	phenylephrine	minor
		acetaminophen	brevicon	minor
		acetaminophen	demulen	minor
		acetaminophen	jenest	minor
		acetaminophen	loestrin 24 fe	minor
		acetaminophen	norethindrone	minor
		acetaminophen	tri-norinyl	minor
		acetaminophen	ampicillin	minor
		acetaminophen	coumadin	minor
		acetaminophen	jantoven	minor
		acetaminophen	warfarin	minor
		acetaminophen	benztropine	minor
		acetaminophen	cogentin	minor
		acetaminophen	brompheniramine	minor
		acetaminophen	pseudoephedrine	minor
		acetaminophen	mebaral	moderate
		acetaminophen	mephobarbital	moderate
		acetaminophen	ephedrine	moderate
		acetaminophen	aminophylline	moderate
		acetaminophen	levonorgestrel	minor
		acetaminophen	phenylpropanolamine	minor
		acetaminophen	cerebyx	moderate
		acetaminophen	fosphenytoin	moderate
		acetaminophen	detrol	minor
		acetaminophen	detrol la	minor
		acetaminophen	tolterodine	minor
		acetaminophen	methotrexate	moderate
		acetaminophen	trexall	moderate
		acetaminophen	scopolamine	minor
		acetaminophen	transderm-scop	minor
		acetaminophen	scopolamine	moderate
		acetaminophen	anaspaz	minor
		acetaminophen	cystospaz	minor
		acetaminophen	donnamar	minor
		acetaminophen	gastrosed	minor
		acetaminophen	hyoscyamine	minor
		acetaminophen	levbid	minor
		acetaminophen	levsin	minor
		acetaminophen	levsinex	minor
		acetaminophen	nulev	minor
		acetaminophen	hyoscyamine	moderate
		acetaminophen	atnaa	minor
		acetaminophen	atropen	minor
		acetaminophen	atropine	minor
		acetaminophen	atropine	moderate
		acetaminophen	solifenacin	minor
		acetaminophen	vesicare	minor
		acetaminophen	darifenacin	minor
		acetaminophen	enablex	minor
		acetaminophen	tenofovir	moderate
		acetaminophen	codeine	moderate
		acetaminophen	hydrocodone	minor
		acetaminophen	sanctura	minor
		acetaminophen	trospium	minor
		acetaminophen	morphine	moderate
		acetaminophen	dextromethorphan	minor
		acetaminophen	rifadin	minor
		acetaminophen	rifampin	minor
		acetaminophen	rimactane	minor
		acetaminophen	rifampin	moderate
		acetaminophen	deferasirox	moderate
		acetaminophen	exjade	moderate
		acetaminophen	etonogestrel	minor
		acetaminophen	liraglutide	minor
		acetaminophen	victoza	minor
		acetaminophen	pancrelipase	minor
		acetazolamide	citric acid	moderate
		acetazolamide	citric acid	major
		acetazolamide sodium	acetaminophen	NA
		acetazolamide sodium	tylenol	NA
		acetazolamide	acetaminophen	major
		acetazolamide	momentum	major
		acetazolamide	amitriptyline	minor
		acetazolamide	elavil	minor
		acetazolamide	endep	minor
		acetazolamide	amitriptyline	moderate
		acetazolamide	diphenhydramine	moderate
		acetazolamide	diphenhydramine	major
		acetazolamide sodium	furosemide	NA
		acetazolamide sodium	lasix	NA
		acetazolamide	urex	moderate
		acetazolamide	lidocaine	minor
		acetazolamide	lidocaine	moderate
		acetazolamide	metronidazole	minor
		acetazolamide	metronidazole	major
		acetazolamide	calcium carbonate	moderate
		acetazolamide	calcium carbonate	major
		acetazolamide	sodium bicarbonate	moderate
		acetazolamide	sodium bicarbonate	major
		acetazolamide	aluminum hydroxide	moderate
		acetazolamide	aluminum hydroxide	major
		acetazolamide	hyoscyamine	moderate
		acetazolamide	hyoscyamine	major
		acetazolamide	achromycin v	minor
		acetazolamide	actisite	minor
		acetazolamide	panmycin	minor
		acetazolamide	sumycin	minor
		acetazolamide	tetracycline	minor
		acetazolamide	tetracycline	major
		acetazolamide	dextromethorphan	moderate
		acetazolamide	dextromethorphan	major
		acetohexamide	citric acid	minor
		acetohexamide	citric acid	moderate
		acetohexamide	salicylic acid	minor
		acetohexamide	magnesium salicylate	moderate
		acetohexamide	diphenhydramine	minor
		acetohexamide	diphenhydramine	moderate
		acetohexamide	lidocaine	minor
		acetohexamide	lidocaine	moderate
		acetohexamide	omeprazole	minor
		acetohexamide	prilosec	minor
		acetohexamide	zegerid	minor
		acetohexamide	omeprazole	moderate
		acetohexamide	dexamethasone	minor
		acetohexamide	decadron	moderate
		acetohexamide	decadron-la	moderate
		acetohexamide	dexamethasone	moderate
		acetohexamide	dexamethasone intensol	moderate
		acetohexamide	dexasone	moderate
		acetohexamide	dexone	moderate
		acetohexamide	hexadrol	moderate
		acetohexamide	aeroseb-hc	minor
		acetohexamide	ala-cort	minor
		acetohexamide	ala-scalp	minor
		acetohexamide	aquanil hc	minor
		acetohexamide	cetacort	minor
		acetohexamide	cort-dome	minor
		acetohexamide	cortaid	minor
		acetohexamide	corticreme	minor
		acetohexamide	dermacort	minor
		acetohexamide	dermolate	minor
		acetohexamide	hi-cor	minor
		acetohexamide	hycort	minor
		acetohexamide	hydrocortisone	minor
		acetohexamide	hytone	minor
		acetohexamide	lacticare-hc	minor
		acetohexamide	locoid	minor
		acetohexamide	locoid lipocream	minor
		acetohexamide	nogenic hc	minor
		acetohexamide	nutracort	minor
		acetohexamide	orabase hca	minor
		acetohexamide	pandel	minor
		acetohexamide	penecort	minor
		acetohexamide	proctocort	minor
		acetohexamide	texacort	minor
		acetohexamide	vytone	minor
		acetohexamide	westcort	minor
		acetohexamide	colocort	moderate
		acetohexamide	cortef	moderate
		acetohexamide	cortenema	moderate
		acetohexamide	cortifoam	moderate
		acetohexamide	hydrocortisone	moderate
		acetohexamide	hydrocortone	moderate
		acetohexamide	medicort	moderate
		acetohexamide	methylprednisolone	minor
		acetohexamide	medrol dosepak	moderate
		acetohexamide	methylprednisolone	moderate
		acetohexamide	alphatrex	minor
		acetohexamide	beta-val	minor
		acetohexamide	betaderm	minor
		acetohexamide	betamethasone	minor
		acetohexamide	betatrex	minor
		acetohexamide	diprolene	minor
		acetohexamide	diprolene af	minor
		acetohexamide	diprosone	minor
		acetohexamide	lotrisone	minor
		acetohexamide	maxivate	minor
		acetohexamide	uticort	minor
		acetohexamide	valisone	minor
		acetohexamide	betamethasone	moderate
		acetohexamide	celestone	moderate
		acetohexamide	calcium carbonate	minor
		acetohexamide	calcium carbonate	moderate
		acetohexamide	sodium bicarbonate	minor
		acetohexamide	sodium bicarbonate	moderate
		acetohexamide	aristocort a	minor
		acetohexamide	flutex	minor
		acetohexamide	kenalog	minor
		acetohexamide	kenalog in orabase	minor
		acetohexamide	oralone	minor
		acetohexamide	triacet	minor
		acetohexamide	triderm	minor
		acetohexamide	aristocort	moderate
		acetohexamide	aristospan	moderate
		acetohexamide	azmacort	moderate
		acetohexamide	kenalog-10	moderate
		acetohexamide	kenalog-40	moderate
		acetohexamide	triamcinolone	moderate
		acetohexamide	trilone	moderate
		acetohexamide	tristoject	moderate
		acetohexamide	aldomet	minor
		acetohexamide	methyldopa	minor
		acetohexamide	aldoril	moderate
		acetohexamide	methyldopa	moderate
		acetohexamide	cormax	minor
		acetohexamide	diltiazem	moderate
		acetohexamide	esomeprazole	minor
		acetohexamide	nexium	minor
		acetohexamide	esomeprazole	moderate
		albuterol sulfate	acetaminophen	NA
		albuterol sulphate	acetaminophen	NA
		albuterol sulfate	tylenol	NA
		albuterol sulphate	tylenol	NA
		albuterol	acetaminophen	moderate
		levalbuterol	acetaminophen	moderate
		albuterol sulfate	aspirin	NA
		albuterol sulphate	aspirin	NA
		albuterol	aspirin	moderate
		levalbuterol	aspirin	moderate
		albuterol	bendroflumethiazide	moderate
		levalbuterol	bendroflumethiazide	moderate
		albuterol	naturetin	moderate
		levalbuterol	naturetin	moderate
		albuterol	rauzide	moderate
		levalbuterol	rauzide	moderate
		albuterol	bendroflumethiazide	major
		levalbuterol	bendroflumethiazide	major
		albuterol	corzide	major
		levalbuterol	corzide	major
		albuterol	guaifenesin	moderate
		levalbuterol	guaifenesin	moderate
		albuterol	apresazide	moderate
		levalbuterol	apresazide	moderate
		albuterol	hydrochlorothiazide	moderate
		levalbuterol	hydrochlorothiazide	moderate
		albuterol	hydrodiuril	moderate
		levalbuterol	hydrodiuril	moderate
		albuterol	microzide	moderate
		levalbuterol	microzide	moderate
		albuterol	hydrochlorothiazide	major
		levalbuterol	hydrochlorothiazide	major
		albuterol	timolide	major
		levalbuterol	timolide	major
		albuterol	hydroxyzine	moderate
		levalbuterol	hydroxyzine	moderate
		albuterol	lidocaine	minor
		levalbuterol	lidocaine	minor
		albuterol	lidocaine	moderate
		albuterol	omeprazole	moderate
		levalbuterol	omeprazole	moderate
		levalbuterol	korlym	moderate
		levalbuterol	mifeprex	moderate
		levalbuterol	mifepristone	moderate
		albuterol	korlym	major
		albuterol	mifeprex	major
		albuterol	mifepristone	major
		albuterol sulfate	spiriva	NA
		albuterol sulphate	spiriva	NA
		albuterol sulfate	tiotropium	NA
		albuterol sulphate	tiotropium	NA
		albuterol sulfate	flonase	NA
		albuterol sulphate	flonase	NA
		albuterol	advair diskus	minor
		albuterol sulfate	advair diskus	minor
		albuterol sulphate	advair diskus	minor
		levalbuterol	advair diskus	minor
		albuterol	flovent	minor
		levalbuterol	flovent	minor
		albuterol	flovent hfa	minor
		levalbuterol	flovent hfa	minor
		albuterol	tenofovir	moderate
		levalbuterol	tenofovir	moderate
		albuterol	formoterol	minor
		albuterol sulfate	formoterol	minor
		albuterol sulphate	formoterol	minor
		levalbuterol	formoterol	minor
		albuterol	codeine	moderate
		levalbuterol	codeine	moderate
		albuterol	topiramate	moderate
		levalbuterol	topiramate	moderate
		alendronate sodium	acetaminophen	NA
		alendronate sodium	tylenol	NA
		alendronate	acetaminophen	moderate
		alendronate	momentum	moderate
		alendronate sodium	ascorbic acid	NA
		alendronate sodium	vitamin c	NA
		alendronate	ascorbic acid	moderate
		alendronate sodium	cholecalciferol	NA
		alendronate sodium	vitamin d3	NA
		alendronate	cholecalciferol	moderate
		alendronate sodium	cyanocobalamin	NA
		alendronate sodium	vitamin b12	NA
		alendronate	cyanocobalamin	moderate
		alendronate	famotidine	minor
		alendronate	fluxid	minor
		alendronate	mylanta ar	minor
		alendronate	pepcid	minor
		alendronate	pepcid ac	minor
		alendronate	pepcid rpd	minor
		alendronate	famotidine	moderate
		alendronate sodium	esomeprazole	NA
		alendronate sodium	nexium	NA
		alendronate	esomeprazole	moderate
		alfuzosin	actiq	moderate
		alfuzosin	duragesic	moderate
		alfuzosin	duragesic-100	moderate
		alfuzosin	fentanyl	moderate
		alfuzosin	fentanyl	major
		alfuzosin	phenazopyridine	minor
		alfuzosin	phenazopyridine	moderate
		alfuzosin	emtricitabine	moderate
		alfuzosin	emtricitabine	major
		alfuzosin	tenofovir	moderate
		alfuzosin	tenofovir	major
		alfuzosin	dextromethorphan	moderate
		alfuzosin	dextromethorphan	major
		allopurinol sodium	acetaminophen	NA
		allopurinol sodium	tylenol	NA
		allopurinol	acetaminophen	moderate
		allopurinol sodium	amlodipine	NA
		allopurinol sodium	norvasc	NA
		allopurinol	amlodipine	moderate
		allopurinol	amlodipine	major
		allopurinol	lotrel	major
		allopurinol sodium	aspirin	NA
		allopurinol	aspirin	moderate
		allopurinol sodium	furosemide	NA
		allopurinol sodium	lasix	NA
		allopurinol	diucardin	moderate
		allopurinol	saluron	moderate
		allopurinol	apresazide	moderate
		allopurinol	hydrochlorothiazide	moderate
		allopurinol	hydrodiuril	moderate
		allopurinol	microzide	moderate
		allopurinol	timolide	moderate
		allopurinol	hydrochlorothiazide	major
		allopurinol sodium	metoprolol	NA
		allopurinol	metoprolol	moderate
		allopurinol sodium	colchicine	NA
		allopurinol sodium	colcrys	NA
		allopurinol	colchicine	minor
		alosetron hcl	acetaminophen	NA
		alosetron	acetaminophen	moderate
		alosetron	valorin extra	moderate
		alosetron hcl	guaifenesin	NA
		alosetron	guaifenesin	moderate
		alprazolam	pyridoxine	minor
		alprazolam	pyridoxine	moderate
		alprazolam	acetaminophen	minor
		alprazolam	acetaminophen	moderate
		alprazolam	momentum	moderate
		alprazolam	talacen	moderate
		alprazolam	acetaminophen	major
		alprazolam	aerolate iii	minor
		alprazolam	aerolate sr	minor
		alprazolam	aquaphyllin	minor
		alprazolam	asmalix	minor
		alprazolam	bronkodyl	minor
		alprazolam	choledyl sa	minor
		alprazolam	elixophyllin	minor
		alprazolam	quibron	minor
		alprazolam	quibron-t	minor
		alprazolam	respbid	minor
		alprazolam	slo-phyllin	minor
		alprazolam	t-phyl	minor
		alprazolam	theo-24	minor
		alprazolam	theo-dur	minor
		alprazolam	theobid	minor
		alprazolam	theochron	minor
		alprazolam	theoclear-80	minor
		alprazolam	theolair	minor
		alprazolam	theolair-sr	minor
		alprazolam	theophylline	minor
		alprazolam	theovent	minor
		alprazolam	uni-dur	minor
		alprazolam	uniphyl	minor
		alprazolam	theophylline	moderate
		alprazolam	aspirin	minor
		alprazolam	aspirin	moderate
		alprazolam	aspirin	major
		alprazolam	butalbital	moderate
		alprazolam	caffeine	minor
		alprazolam	caffeine	moderate
		alprazolam	dhc plus	moderate
		alprazolam	hycomine	moderate
		alprazolam	norgesic forte	moderate
		alprazolam	caffeine	major
		alprazolam	verapamil	moderate
		alprazolam	dyphylline	minor
		alprazolam	dyphylline	moderate
		alprazolam	actiq	moderate
		alprazolam	duragesic	moderate
		alprazolam	duragesic-100	moderate
		alprazolam	fentanyl	moderate
		alprazolam	fentanyl	major
		alprazolam	flurbiprofen	moderate
		alprazolam	guaifenesin	minor
		alprazolam	guaifenesin	moderate
		alprazolam	hydroxyzine	minor
		alprazolam	methscopolamine	moderate
		alprazolam	tricom	moderate
		alprazolam	pheniramine	minor
		alprazolam	pheniramine	moderate
		alprazolam	phentermine	moderate
		alprazolam	permitil	moderate
		alprazolam	potassium chloride	minor
		alprazolam	potassium chloride	moderate
		alprazolam	potassium iodide	minor
		alprazolam	potassium iodide	moderate
		alprazolam	decadron	minor
		alprazolam	decadron-la	minor
		alprazolam	dexamethasone	minor
		alprazolam	dexamethasone intensol	minor
		alprazolam	dexasone	minor
		alprazolam	dexone	minor
		alprazolam	hexadrol	minor
		alprazolam	dexamethasone	moderate
		alprazolam	medicort	minor
		alprazolam	phenylephrine	minor
		alprazolam	phenylephrine	moderate
		alprazolam	brevicon	minor
		alprazolam	demulen	minor
		alprazolam	jenest	minor
		alprazolam	loestrin 24 fe	minor
		alprazolam	norethindrone	minor
		alprazolam	tri-norinyl	minor
		alprazolam	ent	moderate
		alprazolam	ephedrine	minor
		alprazolam	ephedrine	moderate
		alprazolam	aminophylline	minor
		alprazolam	phyllocontin	minor
		alprazolam	truphylline	minor
		alprazolam	aminophylline	moderate
		alprazolam	sodium bicarbonate	minor
		alprazolam	sodium bicarbonate	moderate
		alprazolam	amoxicillin	moderate
		alprazolam	alternagel	minor
		alprazolam	alu-cap	minor
		alprazolam	aluminum hydroxide	minor
		alprazolam	amphojel	minor
		alprazolam	aluminum hydroxide	moderate
		alprazolam	atazanavir	moderate
		alprazolam	tenofovir	moderate
		alprazolam	zonalon	moderate
		alprazolam	naloxone	moderate
		alprazolam	naloxone	major
		alprazolam	naltrexone	moderate
		alprazolam	dextromethorphan	moderate
		alprazolam	rifadin	minor
		alprazolam	rifampin	minor
		alprazolam	rimactane	minor
		alprazolam	rifampin	moderate
		amantadine base	acetaminophen	NA
		amantadine hcl	acetaminophen	NA
		amantadine hydrochloride	acetaminophen	NA
		amantadine base	tylenol	NA
		amantadine hcl	tylenol	NA
		amantadine hydrochloride	tylenol	NA
		amantadine	acetaminophen	moderate
		amantadine	momentum	moderate
		amantadine	acetaminophen	major
		amantadine base	aspirin	NA
		amantadine hcl	aspirin	NA
		amantadine hydrochloride	aspirin	NA
		amantadine	aspirin	moderate
		aminoglutethimide	dilocaine	minor
		aminoglutethimide	l-caine	minor
		aminoglutethimide	lidocaine	minor
		aminoglutethimide	xylocaine-mpf	minor
		aminoglutethimide	lidocaine	moderate
		aminoglutethimide	metformin	minor
		aminoglutethimide	metformin	moderate
		theophylline	acetaminophen	moderate
		theophylline	valorin extra	moderate
		theophylline	acetaminophen	major
		theophylline	alprazolam	minor
		theophylline aminoacetate	alprazolam	minor
		theophylline anhydrous	alprazolam	minor
		theophylline	niravam	minor
		theophylline	xanax	minor
		theophylline aminoacetate	xanax	minor
		theophylline anhydrous	xanax	minor
		theophylline	xanax xr	minor
		theophylline	theophylline	minor
		theophylline	theophylline	moderate
		theophylline	amitriptyline	minor
		theophylline aminoacetate	aspirin	NA
		theophylline anhydrous	aspirin	NA
		theophylline	aspirin	moderate
		theophylline	supac	moderate
		theophylline	bendroflumethiazide	major
		theophylline	corzide	major
		theophylline	cetirizine	minor
		theophylline aminoacetate	cetirizine	minor
		theophylline anhydrous	cetirizine	minor
		theophylline	zyrtec	minor
		theophylline aminoacetate	zyrtec	minor
		theophylline anhydrous	zyrtec	minor
		theophylline	zyrtec-d	minor
		theophylline	chlordiazepoxide	minor
		theophylline	libritabs	minor
		theophylline	librium	minor
		theophylline	chlorpheniramine	minor
		theophylline	chlorpheniramine	moderate
		theophylline	chlorthalidone	major
		theophylline	clidinium	minor
		theophylline	clobazam	minor
		theophylline	clonazepam	minor
		theophylline	klonopin	minor
		theophylline	clorazepate	minor
		theophylline	tranxene	minor
		theophylline	diastat	minor
		theophylline	diazepam	minor
		theophylline	diazepam intensol	minor
		theophylline	dizac	minor
		theophylline	valium	minor
		theophylline	valrelease	minor
		theophylline	zetran	minor
		theophylline	dyphylline	moderate
		theophylline	estazolam	minor
		theophylline	prosom	minor
		theophylline	felodipine	minor
		theophylline	lexxel	minor
		theophylline	plendil	minor
		theophylline	fentanyl	minor
		theophylline	dalmane	minor
		theophylline	flurazepam	minor
		theophylline	furosemide	minor
		theophylline aminoacetate	furosemide	minor
		theophylline anhydrous	furosemide	minor
		theophylline	lasix	minor
		theophylline aminoacetate	lasix	minor
		theophylline anhydrous	lasix	minor
		theophylline aminoacetate	guaifenesin	NA
		theophylline anhydrous	guaifenesin	NA
		theophylline aminoacetate	mucinex	NA
		theophylline anhydrous	mucinex	NA
		theophylline	guaifenesin	minor
		theophylline	guaifenesin	moderate
		theophylline	hydrochlorothiazide	major
		theophylline	timolide	major
		theophylline	hydroxyzine	minor
		theophylline	lidocaine	moderate
		theophylline	lansoprazole	minor
		theophylline	prevacid	minor
		theophylline	prevacid iv	minor
		theophylline	prevacid solutab	minor
		theophylline	lansoprazole	moderate
		theophylline	ativan	minor
		theophylline	lorazepam	minor
		theophylline	lorazepam intensol	minor
		theophylline	methscopolamine	minor
		theophylline	midazolam	minor
		theophylline	versed	minor
		theophylline	adalat	minor
		theophylline	adalat cc	minor
		theophylline	nifedipine	minor
		theophylline	procardia	minor
		theophylline	procardia xl	minor
		theophylline	nisoldipine	minor
		theophylline	sular	minor
		theophylline	oxazepam	minor
		theophylline	serax	minor
		theophylline	potassium iodide	minor
		theophylline	potassium iodide	moderate
		theophylline	diprivan	minor
		theophylline	propofol	minor
		theophylline	doral	minor
		theophylline	quazepam	minor
		theophylline	revatio	minor
		theophylline	sildenafil	minor
		theophylline	viagra	minor
		theophylline	restoril	minor
		theophylline	temazepam	minor
		theophylline	halcion	minor
		theophylline	triazolam	minor
		theophylline	phenylephrine	minor
		theophylline	phenylephrine	moderate
		theophylline	aygestin	moderate
		theophylline	brevicon	moderate
		theophylline	camila	moderate
		theophylline	demulen	moderate
		theophylline	errin	moderate
		theophylline	jenest	moderate
		theophylline	loestrin 24 fe	moderate
		theophylline	nor-qd	moderate
		theophylline	norethindrone	moderate
		theophylline	tri-norinyl	moderate
		theophylline	ephedrine	minor
		theophylline	ephedrine	moderate
		theophylline	aminophylline	moderate
		theophylline	propoxyphene	moderate
		theophylline	levonorgestrel	moderate
		theophylline	mirena	moderate
		theophylline	next choice	moderate
		theophylline	ovrette	moderate
		theophylline	plan b	moderate
		theophylline	halazepam	minor
		theophylline	paxipam	minor
		theophylline	sufentanil	minor
		theophylline	mibefradil	minor
		theophylline	posicor	minor
		theophylline aminoacetate	spiriva	NA
		theophylline anhydrous	spiriva	NA
		theophylline aminoacetate	tiotropium	NA
		theophylline anhydrous	tiotropium	NA
		theophylline aminoacetate	cymbalta	NA
		theophylline anhydrous	cymbalta	NA
		theophylline aminoacetate	duloxetine	NA
		theophylline anhydrous	duloxetine	NA
		theophylline	vfend	moderate
		theophylline	voriconazole	moderate
		theophylline	atazanavir	minor
		theophylline	reyataz	minor
		theophylline	naproxen	minor
		theophylline	naproxen	moderate
		theophylline	ketoconazole	minor
		theophylline	nizoral	minor
		theophylline	ketek	moderate
		theophylline	telithromycin	moderate
		theophylline aminoacetate	cholecalciferol	NA
		theophylline anhydrous	cholecalciferol	NA
		theophylline aminoacetate	vitamin d3	NA
		theophylline anhydrous	vitamin d3	NA
		theophylline aminoacetate	montelukast	NA
		theophylline anhydrous	montelukast	NA
		theophylline aminoacetate	singulair	NA
		theophylline anhydrous	singulair	NA
		theophylline	enalapril	minor
		theophylline	enalapril	moderate
		theophylline	trandolapril	moderate
		theophylline aminoacetate	lyrica	NA
		theophylline anhydrous	lyrica	NA
		theophylline aminoacetate	pregabalin	NA
		theophylline anhydrous	pregabalin	NA
		theophylline	etonogestrel	moderate
		theophylline	implanon	moderate
		amiodarone base	acetaminophen	NA
		amiodarone hcl	acetaminophen	NA
		amiodarone hydrochloride	acetaminophen	NA
		amiodarone base	tylenol	NA
		amiodarone hcl	tylenol	NA
		amiodarone hydrochloride	tylenol	NA
		amiodarone	acetaminophen	minor
		amiodarone	acetaminophen	moderate
		amiodarone	acetaminophen	major
		amiodarone	amlodipine	moderate
		amiodarone	amlodipine	major
		amiodarone base	aspirin	NA
		amiodarone hcl	aspirin	NA
		amiodarone hydrochloride	aspirin	NA
		amiodarone	aspirin	minor
		amiodarone	duramax	minor
		amiodarone	aspirin	moderate
		amiodarone	aspirin	major
		amiodarone	atenolol	moderate
		amiodarone	tenormin	moderate
		amiodarone	atenolol	major
		amiodarone	bisoprolol	moderate
		amiodarone	zebeta	moderate
		amiodarone	bisoprolol	major
		amiodarone	bupivacaine	moderate
		amiodarone	marcaine	moderate
		amiodarone	marcaine hcl	moderate
		amiodarone	sensorcaine	moderate
		amiodarone	sensorcaine-mpf	moderate
		amiodarone	bupivacaine	major
		amiodarone	caffeine	moderate
		amiodarone	caffeine	major
		amiodarone	hycomine	major
		amiodarone	carbinoxamine	minor
		amiodarone	carbinoxamine	major
		amiodarone	chlordiazepoxide	minor
		amiodarone	libritabs	minor
		amiodarone	librium	minor
		amiodarone	chlordiazepoxide	major
		amiodarone	chlorpheniramine	minor
		amiodarone	dexchlorpheniramine	minor
		amiodarone	chlorpheniramine	moderate
		amiodarone	dexchlorpheniramine	moderate
		amiodarone	chlorpheniramine	major
		amiodarone	dexchlorpheniramine	major
		amiodarone	diphenhydramine	minor
		amiodarone	vicks formula 44	minor
		amiodarone	diphenhydramine	moderate
		amiodarone	diphenhydramine	major
		amiodarone	guaifenesin	minor
		amiodarone	guaifenesin	moderate
		amiodarone	guaifenesin	major
		amiodarone	apresoline	moderate
		amiodarone	hydralazine	moderate
		amiodarone	hydralazine	major
		amiodarone	lopressor	moderate
		amiodarone	metoprolol	moderate
		amiodarone base	metoprolol	moderate
		amiodarone hcl	metoprolol	moderate
		amiodarone hydrochloride	metoprolol	moderate
		amiodarone	toprol-xl	moderate
		amiodarone	metoprolol	major
		amiodarone	pheniramine	minor
		amiodarone	pheniramine	moderate
		amiodarone	pheniramine	major
		amiodarone	inderal	moderate
		amiodarone	inderal la	moderate
		amiodarone	innopran xl	moderate
		amiodarone	propranolol	moderate
		amiodarone	inderide	major
		amiodarone	propranolol	major
		amiodarone	pyrilamine	minor
		amiodarone	pyrilamine	moderate
		amiodarone	pyrilamine	major
		amiodarone	phenylephrine	minor
		amiodarone	phenylephrine	moderate
		amiodarone	phenylephrine	major
		amiodarone	brompheniramine	minor
		amiodarone	brompheniramine	moderate
		amiodarone	brompheniramine	major
		amiodarone	pseudoephedrine	minor
		amiodarone	pseudoephedrine	moderate
		amiodarone	pseudoephedrine	major
		amiodarone	ephedrine	minor
		amiodarone	ephedrine	moderate
		amiodarone	dexbrompheniramine	minor
		amiodarone	dexbrompheniramine	moderate
		amiodarone	dexbrompheniramine	major
		amiodarone	magnesium sulfate	moderate
		amiodarone	magnesium sulfate	major
		amiodarone	phenylpropanolamine	minor
		amiodarone	phenylpropanolamine	moderate
		amiodarone	phenylpropanolamine	major
		amiodarone	betimol	moderate
		amiodarone	blocadren	moderate
		amiodarone	istalol	moderate
		amiodarone	timolol	moderate
		amiodarone	timoptic	moderate
		amiodarone	timoptic ocudose	moderate
		amiodarone	timoptic-xe	moderate
		amiodarone	timolol	major
		amiodarone	corgard	moderate
		amiodarone	nadolol	moderate
		amiodarone	nadolol	major
		amiodarone	valsartan	moderate
		amiodarone	valsartan	major
		amiodarone	emtricitabine	moderate
		amiodarone	emtricitabine	major
		amiodarone	atazanavir	moderate
		amiodarone	reyataz	moderate
		amiodarone	atazanavir	major
		amiodarone	ezetimibe	moderate
		amiodarone	ezetimibe	major
		amiodarone	naropin	moderate
		amiodarone	ropivacaine	moderate
		amiodarone	ropivacaine	major
		amiodarone	darunavir	moderate
		amiodarone	prezista	moderate
		amiodarone	darunavir	major
		amiodarone	tenofovir	moderate
		amiodarone	tenofovir	major
		amiodarone	triprolidine	moderate
		amiodarone	triprolidine	major
		amiodarone	codeine	moderate
		amiodarone	codeine	major
		amiodarone	naloxone	moderate
		amiodarone	naloxone	major
		amiodarone	balminil dm	minor
		amiodarone	benylin dm	minor
		amiodarone	cough-x	minor
		amiodarone	creo-terpin	minor
		amiodarone	delsym	minor
		amiodarone	dextromethorphan	minor
		amiodarone	hold dm	minor
		amiodarone	novahistine dm	minor
		amiodarone	dextromethorphan	major
		amiodarone	aliskiren	moderate
		amiodarone	tekturna	moderate
		amiodarone	aliskiren	major
		amitriptyline	citric acid	minor
		amitriptyline	citric acid	major
		amitriptyline	acetaminophen	moderate
		amitriptyline hcl	acetaminophen	moderate
		amitriptyline hydrochloride	acetaminophen	moderate
		amitriptyline	momentum	moderate
		amitriptyline	talacen	moderate
		amitriptyline	acetaminophen	major
		amitriptyline	acetazolamide	minor
		amitriptyline	diamox	minor
		amitriptyline	diamox sequels	minor
		amitriptyline	theophylline	major
		amitriptyline	amobarbital	moderate
		amitriptyline	amobarbital	major
		amitriptyline hcl	aspirin	NA
		amitriptyline hydrochloride	aspirin	NA
		amitriptyline	aspirin	moderate
		amitriptyline	aspirin	major
		amitriptyline	duramax	major
		amitriptyline	benzocaine	moderate
		amitriptyline	benzocaine	major
		amitriptyline	bupivacaine	moderate
		amitriptyline	bupivacaine	major
		amitriptyline	caffeine	moderate
		amitriptyline	dhc plus	moderate
		amitriptyline	fioricet	moderate
		amitriptyline	hycomine	moderate
		amitriptyline	norgesic forte	moderate
		amitriptyline	caffeine	major
		amitriptyline	carbinoxamine	moderate
		amitriptyline	carbinoxamine	major
		amitriptyline	aller-chlor	moderate
		amitriptyline	chlo-amine	moderate
		amitriptyline	chlor-trimeton	moderate
		amitriptyline	chlorpheniramine	moderate
		amitriptyline	dexchlorpheniramine	moderate
		amitriptyline	polaramine	moderate
		amitriptyline	teldrin	moderate
		amitriptyline	chlorpheniramine	major
		amitriptyline	dexchlorpheniramine	major
		amitriptyline	chlorthalidone	moderate
		amitriptyline	hygroton	moderate
		amitriptyline	thalitone	moderate
		amitriptyline	chlorthalidone	major
		amitriptyline	chlophedianol	moderate
		amitriptyline	chlophedianol	major
		amitriptyline	banophen	moderate
		amitriptyline	beldin	moderate
		amitriptyline	belix	moderate
		amitriptyline	benadryl	moderate
		amitriptyline	diphen	moderate
		amitriptyline	diphen cough	moderate
		amitriptyline	diphenhist	moderate
		amitriptyline	diphenhydramine	moderate
		amitriptyline	genahist	moderate
		amitriptyline	hydramine	moderate
		amitriptyline	hyrexin	moderate
		amitriptyline	nytol quickcaps	moderate
		amitriptyline	siladryl	moderate
		amitriptyline	diphenhydramine	major
		amitriptyline	antabuse	minor
		amitriptyline	disulfiram	minor
		amitriptyline	doxylamine	moderate
		amitriptyline	doxylamine	major
		amitriptyline	dyphylline	major
		amitriptyline	actiq	moderate
[truncated: 43,784 more rows]
